# Supplementary material for: Improving Preparedness for and Response to Coronavirus Disease 19 (COVID-19) in Long-Term Care Hospitals in Korea
Source: PubMed Central journal article supplement — Infect Chemother. 2020 Jun 25;52(2):133–41. doi: 10.3947/ic.2020.52.2.133 (PMC7335647; doi:10.3947/ic.2020.52.2.133), 2020-06-25
Supplement: ic-52-133-s001.pdf [file ic-52-133-s001.pdf]

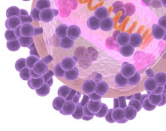

## Review Article

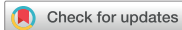

# 요양병원의 COVID-19 대응을 위한 제언

## OPEN ACCESS

Received: Apr 30, 2020

Accepted: May 4, 2020

### Corresponding Author:

Tark Kim, MD, PhD

Department of Internal Medicine,  
Soonchunhyang University Bucheon Hospital,  
170 Jomaru-ro, Wonmi-gu, Bucheon 14584,  
Gyeonggi-do, Korea.  
Tel: +82-32-621-5203  
Fax: +82-32-621-5018  
E-mail: ktocc@schmc.ac.kr

Copyright © 2020 by The Korean Society  
of Infectious Diseases, Korean Society for  
Antimicrobial Therapy, and The Korean Society  
for AIDS

This is an Open Access article distributed  
under the terms of the Creative Commons  
Attribution Non-Commercial License (<https://creativecommons.org/licenses/by-nc/4.0/>)  
which permits unrestricted non-commercial  
use, distribution, and reproduction in any  
medium, provided the original work is properly  
cited.

### ORCID iDs

Tark Kim   
<https://orcid.org/0000-0002-8829-4183>

### Conflict of Interest

No conflicts of interest.

김탁 <sup>1,2,3</sup>

<sup>1</sup>순천향대학교 부천병원 감염내과

<sup>2</sup>대한감염학회 신종감염병 위원회 산하 정책위원회

<sup>3</sup>경기도 코로나-19 위기대응센터 전문가 자문위원회

## ABSTRACT

우리나라 뿐만 아니라 전세계적으로 장기요양시설의 코로나-19 집단 유행 사례가 보고되고 있다. 코로나-19는 고령의 환자와 기저 질환이 있는 경우에 치명율이 높다. 장기요양시설에서 집단 유행이 발생할 경우 중증의 코로나-19 환자를 위한 병상을 급속히 소모하게 되고, 다수의 환자가 사망하게 된다. 요양병원은 우리나라의 주요한 장기요양시설이다. 따라서, 요양병원을 코로나-19로부터 보호하는 것은 매우 중요하다. 요양병원의 코로나-19 대응 준비는 충분하지 않고, 준비 상태를 향상시키는데는 많은 장벽들이 있는 것이 현실이다. 제도 개선과 정책 지원을 통해서 요양병원의 시설을 개선하고 감염관리에 대한 지식 수준을 높여야 한다. 이러한 개선 활동을 통해서 코로나-19에 대한 예방, 감시, 선별 기능을 향상시키고 환자 발생시 빠르게 대응할 수 있는 체계를 준비해야 한다. 본 종설에 제안된 내용을 실현해 가는데 많은 어려움이 있다. 연대의 정신과 정부, 민간, 공공 의료의 협력으로 이 어려움을 극복할 수 있을 것이다.

**Keywords:** 코로나-19; 요양병원; 준비

## 배경

코로나-19 (Coronavirus Disease 2019)는 SARS-CoV-19 (Severe Acute Respiratory Syndrome Coronavirus 2019) 바이러스에 의한 급성호흡기감염질환이다. 2019년 12월 31일 중국 우한에서 처음 보고되었고 [1], 이후 전세계로 급격히 확산되어 세계보건기구(World Health Organization, WHO)는 2020년 3월 11일 세계적 대유행(pandemic)을 선언하였다. 2020년 4월 20일 기준으로 전세계적으로 2,314,621명의 감염자가 발생하여 157,847 명의 사망자가 발생하였다 [2]. 실제 감염자는 보고된 것보다 많을 것으로 추산된다 [3].

코로나-19는 15.7%에서 중증의 폐렴을 일으켜 사망에 이르게 한다 [4]. 특히 고령의 환자에서 높은 치명율을 보이는 것이 잘 알려져 있다. 우리나라에서는 50대 이하에서 치명율이 0.1% 이하이지만 50대에서 이상에서는 2.0%이고 80대에서는 8.5%까지 증가한다 [5]. 기저질환이 없는 경우와 비교하여 심혈관계 질환 같은 기저질환이 있는 경우에 치명율이 높은 것으로 보고되고 있다 [6]. 장기요양시설에는 코로나-19의 고위험군인 고령의 환자와 기저 질환자들이 밀집된 상태로 입원하고 있다. 실제로 우리나라 뿐만 아니라 전세계적으로 장기요양시설에서 높은 치명율을 일으킨 코로나-19 집단 유행 사례들이 보고되고 있다 [7-10]. 요양병원은 우

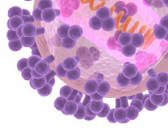

리나라의 장기요양의료에서 중요한 역할을 하고 있다. 따라서, 요양병원을 코로나-19로부터 보호하고 환자, 의료인, 간병인 중 코로나-19 감염자가 발생했을 때에 적절하게 대응하도록 만드는 것은 매우 중요하다. 본 종설에서는 우리나라 요양병원의 코로나-19 대응준비 현황을 살펴보고, 향후 코로나-19에 대한 대응 전략을 제안하려고 한다.

### 우리나라 요양병원 현황

요양병원은 질병이나 장애로 인해 장기 치료가 필요한 환자에게 의료서비스를 제공하는 것을 목적으로 하는 장기요양시설이다. 요양병원은 의료기관이기 때문에 건강보험공단에 의료비를 청구하고, 30병상의 입원실, 환자 40명당 1인의 의사, 환자 6명당 1인의 간호사를 두도록 시설과 의료인력에 대한 규정의 영향을 받고 있다 [11]. 노인장기요양보험에서 재원이 나오고, 노화 등에 따른 신체, 정신적 기능 저하로 거동이 불편한 자에게 일상생활을 지원하며, 상주하는 의료인력이 없는 요양원등의 다른 장기요양시설과 달리 요양병원은 의료서비스를 의무적으로 제공한다는 점에서 근본적인 차이가 있다. 우리나라에는 2018년 기준으로 1,363개의 요양병원이 있고, 그 중 서울/경기/인천 지역에 33.5% (457/1,363)가 집중되어 있다 [12].

Table 1에서 보는 것처럼 요양병원 환자를 의료서비스의 필요 여부, 문제 행동, 인지 기능 장애의 여부에 따라 환자 등급을 나누고 있다. 요양병원에 입원한 환자 중 의료서비스가 반드시 필요하지 않은 인지장애군이나 신체기능저하군이 49.6%에 이른다 [12]. Table 2에 보는 것처럼, 63.1% (861/1,363)의 요양병원은 100 - 200병상 규모이고, 13.0% (178/1,363)의 요양병원은 100병상 미만으로 운영되고 있다. 의료인력, 필요인력, 진료과정, 진료결과 등의 기준에 따라 보건복지수에서 요양병원에 대한 입원급여 적정성 평가를 시행하고 있다. 그 결과에 따르면, 1등급을 만족하는 요양병원은 18.2% (248/1,363)에 불과하고, 2등급 (37.2%) 또는 3등급 (23.7%)에 해당하는 경우가 많다 [12]. 특히, 요양병원의 약 80%를 차지하는 200병상 미만의

Table 1. 우리나라 요양병원의 환자군별 현황

| 구분      | 내용                                                    | 건 (%)           |
|---------|-------------------------------------------------------|-----------------|
| 의료최고도   | 혼수상태, 인공호흡기간호, 체내출혈 등 중환자 수준                          | 10,910 (1.5)    |
| 의료고도    | 일상생활동작이 많이 저하, 신경난치성질환 또는 욕창치료                        | 180,167 (25.6)  |
| 의료중도    | 일상생활동작 저하와 신경난치성질환을 갖고있거나, 일반병실환자 수준의 의료적 서비스가 필요한 경우 | 145,666 (20.7)  |
| 의료경도    | 위의 분류군 외에 전문재활서비스를 받고 있는 경우                           | 12,722 (1.8)    |
| 문제행동군   | 망상, 환각, 초조, 공격성 배회 등 문제행동이 있는 경우                      | 5,617 (0.8)     |
| 인지장애군   | 분명한 인지기능장애가 있는 경우                                     | 279,630 (39.7)  |
| 신체기능저하군 | 위의 어느 상태에도 해당되지 않는 경우                                 | 69,743 (9.9)    |
| 합계      |                                                       | 704,475 (100.0) |

건강보험심사평가원. 2018년도[7차] 요양병원 입원급여 적정성 평가 결과

Table 2. 우리나라 요양병원의 병상규모에 따른 등급별 기관수와 비율

| 병상수  | >500 (n [%]) | 400 - 500 (n [%]) | 300 - 400 (n [%]) | 200 - 300 (n [%]) | 100 - 200 (n [%]) | <100 (n [%]) |
|------|--------------|-------------------|-------------------|-------------------|-------------------|--------------|
| 1등급  | 5 (29.4)     | 5 (17.2)          | 19 (22.4)         | 69 (35.6)         | 137 (15.9)        | 13 (7.3)     |
| 2등급  | 7 (41.2)     | 18 (62.1)         | 41 (48.1)         | 74 (38.1)         | 338 (39.3)        | 30 (16.9)    |
| 3등급  | 4 (23.5)     | 5 (17.2)          | 19 (22.4)         | 35 (18.1)         | 221 (25.7)        | 39 (21.9)    |
| 4등급  | 1 (5.9)      | 1 (3.5)           | 5 (5.9)           | 9 (4.6)           | 93 (10.8)         | 34 (19.1)    |
| 5등급  | 0 (0.0)      | 0 (0.0)           | 1 (1.2)           | 6 (3.1)           | 46 (5.3)          | 31 (17.4)    |
| 등급제외 | 0 (0.0)      | 0 (0.0)           | 0 (0.0)           | 1 (0.5)           | 26 (3.0)          | 31 (17.4)    |
| 총계   | 17 (100.0)   | 29 (100.0)        | 85 (100.0)        | 194 (100.0)       | 861 (100.0)       | 178 (100.0)  |

건강보험심사평가원. 2018년도[7차] 요양병원 입원급여 적정성 평가 결과



요양병원의 1등급 비율은 200병상 이상의 요양병원의 1등급 비율에 비하여 통계적으로 유의하게 낮다 (14.4% [150/1,039] 200병상 미만 대 30.2% [98/325] 200병상 이상;  $P < 0.01$ ). 의사 1인당 환자수의 중앙값은 31.8명 (사분위수, 29.4 ~ 33.6) 이고 간호사 1인당 환자수의 중앙값은 10.5명 (사분위수 8.4 ~ 12.6)으로 간호 인력은 권고 인력 기준에 미치지 못하고 있다 [12]. 요양병원은 환자 등급에 따라 일당 정액 수가제로 운영되고 있고 있다 [11].

### 우리나라의 코로나-19 요양병원 집단유행 현황

장기요양시설의 환자 발생은 전국적으로 확인되었으나 Table 3에서 보는 것처럼 요양병원의 집단유행은 주로 대구, 경북에서 발생하였다. 특히, 대구한사랑요양병원에서는 126명, 경산서요양병원의 경우 72명의 환자가 발생하였다. 이처럼 요양병원에서 집단유행이 발생할 경우 고위험군으로 분류되는 환자가 다수 발생하여 중증환자를 위한 병상을 급속하게 소모하게 될 가능성이 높다. 참고로 경기도의 코로나-19 중증환자를 위한 병상은 27개에 불과하여 요양병원 1개의 집단 유행만으로 소진될 우려가 있다.

### 간호조무사가 확진된 요양병원 대응 사례

경기도 코로나-19 위기대응센터 전문가 자문위원회의 자문위원 자격으로 부천의 한 요양병원에서 발생한 코로나-19 사례에 대한 응급대응을 자문하였다. 조치와 관련된 정보는 부천시 코로나-19 현황 웹사이트에서 확인할 수 있다 [13]. 2020년 3월 9일 구로의 빌딩에 입점해 있는 콜센터에서 집단 유행이 확인되었다. 해당 빌딩에서 근무하던 확진된 직원이 2020년 3월 8일 부천에 소재한 교회에서 예배를 드린 것이 확인되었다. 접촉자 추적 결과, 해당 교회에서 확진자와 같이 예배를 드린 접촉자 중의 부천의 요양병원에서 간호조무사로 근무하는 사람이 있는 것이 확인되었고, 검사결과 2020년 3월 12일에 이 간호조무사도 확진판정을 받았다. 확진자와 접촉한 이후 간호조무사는 2020년 3월 10일, 3월 11일에 근무를 하였고 3월 12일부터 격리되었다. 간호조무사는 코로나-19와 관련된 증상을 호소하지 않았고, 근무시에 장갑과 마스크를 착용했다고 하였다. 확진된 간호조무사가 근무하는 요양병원은 지하1층, 지상 5층 건물 중 지상 2-5층을 사용하였고, 확진 당시에 환자 142명, 직원과 간병인 85명이 있었다. 각 병실마다 6-10명의 환자가 입원하고 있었고 병상간 간격은 1m도 되지 않았다. 코호트 격리 시작 당시에 시행한 전수 검사에서 간호조무사 이외의 추가 감염자는 없었다. 모든 환자와 22명의 직원과 간병인이 밀접접촉자로 분류되었다. 역학조사팀은 병원의 모든 지역을 오염 구역으로 간주하였고, 특히 확진된 간호조무사가 주로 활동한 3-4층을 고위험지역으로 분류하였다. 밀접접촉으로 분류된 직원과 환자 중 16명의 직원과 일부 퇴원이 가능한 환자들은 자가격리하도록 조치되었다. 2층과 5층의 환자 중 73명은 공공병원과 근처 민간병원으로 전원

Table 3. 우리나라 코로나-19 요양병원 집단 발생 현황

| 지역    | 명칭       | 확진일       | 총환자수 |
|-------|----------|-----------|------|
| 대구    | 김신요양병원   | 2020.2.24 | 46   |
| 대구    | 시지노인전문병원 | 2020.3.6  | 16   |
| 대구    | 한사랑요양병원  | 2020.3.17 | 126  |
| 대구    | 대실요양병원   | 2020.3.17 | 98   |
| 경북 경산 | 서요양병원    | 2020.3.19 | 72   |

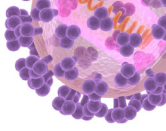

되었다. 이러한 조치 후에 남은 환자들은 2 m 이상 간격을 유지하도록 병상을 재조정하여 코로트 격리하고 간병인도 각 병실에 함께 상주하도록 하고 이동을 제한하였다. 14명의 간호사와 간호조무사는 환자 간호를 위해 병원내 코호트 격리를 자원하였다.

Figure 1에 공간배치와 동선을 간단히 도식화 하였다. 코호트 격리된 간호사와 간호조무사는 입원 공간과 분리된 3층 공간 일부를 사용하여 숙식을 하도록 하고 외부 출입을 금지하였다. 소독을 시행한 후에 2층 공간은 접촉자로 분류되지 않아 출퇴근이 가능한 직원들이 근무하고 착의할 수 있는 안전 공간으로 사용하도록 하였다. 지하 1층에 주차장에 임시로 탈의 공간을 마련하였다. 1층과 2층에 병원 외의 시설이 있었으므로 엘리베이터는 외부인이 사용하지 못하도록 하고 계단을 이용하여 출입하도록 하였다. 내부에 있는 식당도 폐쇄하였으므로 환자나 직원의 식사는 외부에서 공급 받았다. 14일 관찰기간이 종료된 이후에 시행된 전수 검사에서 추가 확인자는 발견되지 않아 요양병원의 코로트 격리를 해제하였다.

### 요양병원 코로나-19 예방과 대응에서 확인된 문제들

많은 구조적 이유 때문에 요양병원을 코로나-19로부터 보호하고 환자 발생시에 빠르게 대응하는 것이 매우 어려운 실정이다. 한 병실에 많은 환자들이 있고 병상간 간격이 가까워 환자

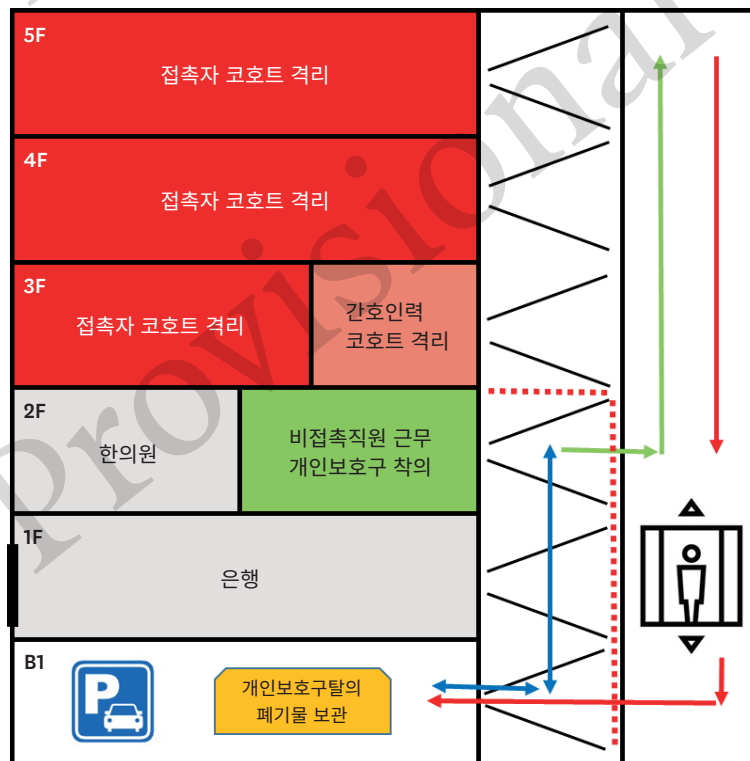

Figure 1. 요양병원에서 발생한 코로나-19 대응 사례  
 녹색선은 개인보호장구를 착용한 의료인의 동선을 의미하고 적색선은 환자진료 후의 동선을 의미한다. 간호사와 간호조무사는 3층의 입원실과 분리된 공간에서 자발적으로 코호트 격리하였다. 소독을 시행한 후에 2층 공간은 접촉자로 분류되지 않아 출퇴근이 가능한 직원들이 근무하고 착의할 수 있는 안전 공간으로 사용하도록 하였다. 지하 1층에 주차장에 임시로 탈의 공간을 마련하였다. 엘리베이터는 외부인이 사용하지 못하도록 하고 1층과 2층의 은행과 한의원에는 계단을 이용하여 출입하도록 하였다 (청색선).



가 전파가 쉽게 이루어질 수 있다. 요양병원에 격리, 코호트 운영을 위한 병실이 부족하다. 2018년도에 시행된 한 연구에 따르면 격리실이나 음압실이 있는 요양병원은 각각 58.5% (121/707), 0.5% (1/208) 에 불과하였다 [14]. 격리를 위한 시설 미비와 병원내 감염 전파에 대한 우려 때문에 다른 병원으로 접촉자를 전원시키는 것이 어렵다. 감염예방관리에 대한 직원들의 지식도 부족한 것으로 보인다. 이전 연구에 따르면 요양병원에 근무하는 감염관리담당자들은 감염예방관리에 대한 교육을 원하였다 [14, 15]. 저자가 근무하는 병원의 감염예방관리팀이 해당 요양병원에 방문하여 소독과 보호구 착용의 같은 기본적인 내용을 교육해야만 했다. 요양병원의 코로나-19 유행이 발생했을 때 역학조사팀과의 병원내 소통 창구가 분명하지 않고 응급 대응을 위한 결정이 시급하게 이루어지지 않는다. 요양병원이 들어서 있는 건물들이 의료 시설을 위해 지어진 것이 아니므로 공조 시설이 갖추어져 있지 않아 창문을 여는 것 외에는 환기를 할 수 있는 방법이 없는 곳이 많다. 게다가 건물내에 다른 입점 시설들이 있어서 방문자와 환자의 동선을 관리하기가 어렵다. 요양병원에 코로나-19 검사를 위한 검체를 채취할 공간과 인력이 없고, 검체를 운송하고 검사 결과를 보고 받을 체계가 갖추어져 있지 않다 [16]. 해당 사례의 경우에도 보건소가 요양병원을 대신하여 검체채취, 의뢰, 운송, 결과보고를 해야만 했다.

### 요양병원 코로나-19 대응을 위한 제언

Figure 2에 요양병원을 코로나-19로부터 보호하기 위한 제안을 요약하였다. 제도 개선과 정책 지원을 통해 감염예방관리에 대한 시설과 지식을 향상시켜, 코로나-19에 대한 예방, 감시, 선별 기능을 강화해야 한다.

현재 요양병원의 감염예방관리 역량은 제한되어 있다. 이는 노인 인구의 증가에 따른 인구학적 이유에 의한 불가피한 측면도 있으나 [17], 제도적 문제에 의해 야기한 부분도 있다. 첫째,

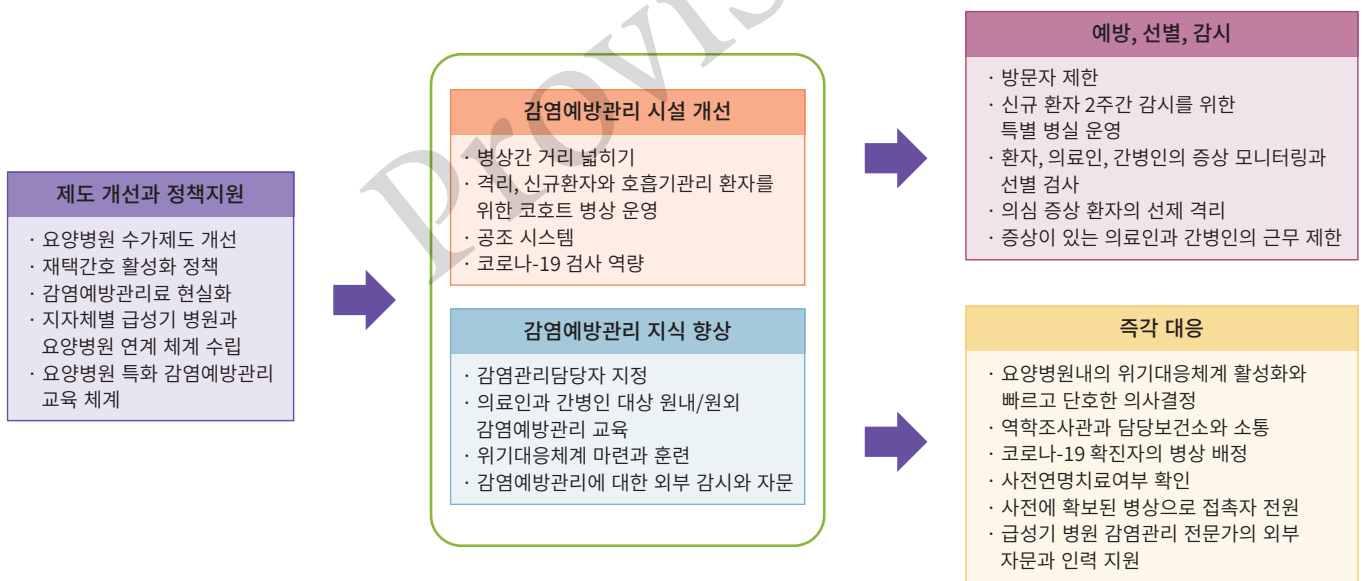

Figure 2. 요양병원의 COVID-19 대응을 위한 제언



재택 간호를 보호자들이 스스로 할 수 있는 여건이 마련되지 않아 요양병원에 입원할 수 밖에 없는 경우들이 많다. 의료기관 중심의 가정간호를 제공하는 의료기관의 숫자가 줄어들고 있다 [18]. 이는 요양병원의 과밀화를 일으킨다. 제도적 지원을 통해 가정간호사나 간병인이 재택치료를 돕도록 하여 요양병원 입원이 아닌 가정간호를 선택할 수 있도록 해야한다 [19]. 둘째, 입원 환자 숫자에 따라 급여비가 지급되는 일당 급여 청구제는 요양병원을 유지하기 위해서 많은 환자들을 입원시키도록 만든다. 이러한 수가제도하에서는 병실마다 많은 사람을 입원시켜야 하고, 시설이나 인력에 투자할 수가 없다 [20, 21]. 감염예방관리를 현실화하여 시설이나 인력투자를 유도할 수 있도록 하고, 감염예방관리료가 적정하게 사용되고 있는지 감시를 해야 하겠다. 셋째, 대부분의 요양병원이 자체 인력만으로 교육이나 감염관리를 담당하기 어려우므로 지자체에서는 감염관리 역량을 갖춘 주변의 급성기 병원과 짝을 지워주고 도움을 받을 수 있도록 지원한다 [17]. 또한, 정부는 감염예방관리에 대한 교육을 체계적으로 제공해야 한다 [17].

감염예방관리와 관련된 시설이 설치된 곳일수록 의료질이 높다 [22]. 격리시설이 없는 것이 요양병원 감염예방관리의 가장 큰 장벽이라고 감염관리담당자들은 호소하고 있다 [21]. 격리와 검체채취를 위한 별도의 시설이 있어야 하고, 신규 환자들이나 호흡기 증상이 있는 환자들이 입원할 수 있도록 배정할 수 있는 병실을 마련해야 한다 [23]. 가능하면 적절한 공조 시설을 갖추도록 해야 하겠다. 또한, 요양병원이 스스로 코로나-19 검사를 시행할 수 있는 역량을 갖추면 바람직 하겠다.

감염예방관리 지식 측면에서는 감염관리담당자를 각 요양병원에 두도록 한다. 감염관리담당자는 대학병원, 급성기 병원, 또는 정부가 제공하는 적절한 수준의 감염예방관리교육을 이수하도록 한다. 교육의 내용은 요양병원의 현실을 반영할 수 있도록 특화되어야 한다 [21]. 감염관리담당자의 업무는 다음과 같다: (1) 직원들에게 감염예방관리에 대한 교육을 시행한다. (2) 환자와 직원의 증상 여부를 모니터링하고 결과를 보고한다 (3) 유사시를 대비하기 위하여 계획을 세우고 대응훈련을 시행한다. (4) 코로나-19 환자 발생시에 역학조사팀과 소통하고 의사 결정을 돕는다. 정기적으로 지자체별로 연계된 급성기병원의 감염관리인력이 방문하여 실태를 점검하고 개선책을 마련하도록 돕는다.

요양병원을 코로나-19로부터 보호하기 위한 중요한 수단은 선제적 격리, 선별, 그리고 검사 시행이다. 신규입원 환자의 증상 여부를 확인하고 필요시 검사를 시행한다. 가능하다면, 특별병실을 마련하여 신규입원 환자들을 잠복기 동안 코호트하는 것도 고려해 볼 수 있다 [23]. 의심되는 증상이나 징후가 있는 환자가 확인되면 별도의 병실에 격리하고 코로나-19 검사를 시행한다. 직원들은 출근 전과 출근 이후에 증상 여부를 감염관리담당자에게 보고하고, 간병인도 하루 2회 이상 증상 여부를 감염관리담당자에게 알리도록 한다 [23, 24]. 증상이 있는 직원이나 간병인은 검사를 받도록 하고, 결과가 확인되기 전까지 근무에서 배제한다. 지자체는 근무에서 제외되는 직원이나 간병인의 급여와 대체인력을 지원할 수 있는 방안을 고려해야 한다. 요양병원 스스로 검체를 채집하고 검사를 의뢰할 수 있다면, 감시 기관의 역할까지도 기대할 수 있겠다.

코로나-19가 요양병원에서 발생했을 때 피해를 최소화하기 위해서는 즉각적이고 정확하게 조치가 이루어져야 한다. 이를 위해서 유사시 대응을 위한 조직 체계를 갖추고 업무 배분을 미

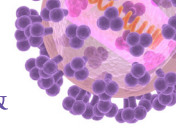

리 명확하게 해 두어야 한다. 최종 책임자는 감염관리담당자를 통하여 역학조사관의 지시를 받아 의사결정을 빠르게 내려야 한다. 최근에 미국에서 시행된 연구에 따르면 장기요양시설에서 무증상자를 대상으로 시점유병률검사 (point-prevalence test)를 시행한 결과 63% (48/76)가 감염자로 밝혀졌다고 한다 [25]. 이는 요양병원에서 코로나-19 환자가 발생하면 증상 여부와 관련없이 모든 환자에 대해서 검사를 시행해야 함을 시사한다 [26]. 요양병원의 검사역량이 부족할 경우 보건소가 검사를 지원해야 한다. 확진자는 병상 배정 원칙에 따라 이송한다. 요양기관의 집단 유행 발생시에 대부분의 환자가 고위험에 속하여 중증 병상을 급속하게 소모하게 되므로, 사전연명의료의향서를 요양기관에서 자체적으로 받을 수 있도록 하여 코로나-19의 사망률을 줄이기 위한 가장 핵심적 의료자원인 중증 환자를 위한 병상의 소모를 막아야 한다. 지차체는 지역 내 급성기 병원의 도움을 받아 유사시에 접촉자를 전원 보낼 수 있도록 병상을 미리 확보하고, 정해진 약속에 따라 신속하게 조치가 이루어지도록 해야 한다. 또한, 지원을 하게 될 감염관리 전문가와 대체 인력도 주변 의료기관의 협조를 구하여 사전에 정하고, 유사시 즉각적인 지원이 가능하도록 준비해야 한다.

## 결론

감염예방관리를 위한 시설과 능숙한 인력 없이 현재 상태에서는 요양병원의 집단 유행을 막기 어려울 것으로 생각한다. 요양병원의 코로나-19 집단 유행으로 인해 많은 사람들이 사망하고 중증 코로나-19 환자를 위해 준비된 병상이 부족해질 우려가 크다. 이러한 상황을 정부는 심각하게 받아들이고, 요양병원이 코로나-19 대응 능력을 갖추도록 제도적, 정책적 지원을 해야 한다. 연대의 정신과 정부, 민간, 공공 의료의 협력이 코로나-19로부터 요양병원을 보호할 수 있을 것이다.

## 감사의 말

이 종설은 제 3회 경기도 코로나 웨비나에서 발표한 내용을 토대로 작성하였다. 대한감염학회 신종감염병 위원회 산하 정책위원회와 경기도 코로나-19 위기대응센터 전문가 자문위원회의 심도 있는 토론을 기반으로 작성하였다. 다만, 지금의 내용이 경기도 감염병관리단과 대한감염학회의 공식적인 의견은 아님을 밝혀두는 바이다. 요양병원 자문을 위해 애써준 순천향대학교 부천병원 감염관리실에 감사의 마음을 전한다.

## REFERENCES

1. Zhu N, Zhang D, Wang W, Li X, Yang B, Song J, Zhao X, Huang B, Shi W, Lu R, Niu P, Zhan F, Ma X, Wang D, Xu W, Wu G, Gao GF, Tan W China Novel Coronavirus Investigating and Research Team. A novel coronavirus from patients with pneumonia in China. *N Engl J Med* 2020;382:727-33.  
[PUBMED](#) | [CROSSREF](#)
2. World Health Organization (WHO). Coronavirus disease 2019 (COVID-19) situation report-91. Available at: [https://www.who.int/docs/default-source/coronaviruse/situation-reports/20200420-sitrep-91-covid-19.pdf?sfvrsn=fef0670b\\_10](https://www.who.int/docs/default-source/coronaviruse/situation-reports/20200420-sitrep-91-covid-19.pdf?sfvrsn=fef0670b_10). Accessed 23 April 2020.

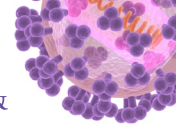

3. Li R, Pei S, Chen B, Song Y, Zhang T, Yang W, Shaman J. Substantial undocumented infection facilitates the rapid dissemination of novel coronavirus (SARS-CoV-2). *Science* 2020;368:489-93.  
[PUBMED](#) | [CROSSREF](#)
4. Guan WJ, Ni ZY, Hu Y, Liang WH, Ou CQ, He JX, Liu L, Shan H, Lei CL, Hui DSC, Du B, Li LJ, Zeng G, Yuen KY, Chen RC, Tang CL, Wang T, Chen PY, Xiang J, Li SY, Wang JL, Liang ZJ, Peng YX, Wei L, Liu Y, Hu YH, Peng P, Wang JM, Liu JY, Chen Z, Li G, Zheng ZJ, Qiu SQ, Luo J, Ye CJ, Zhu SY, Zhong NSChina Medical Treatment Expert Group for Covid-19. Clinical characteristics of coronavirus disease 2019 in China. *N Engl J Med* 2020;382:1708-20.  
[PUBMED](#) | [CROSSREF](#)
5. COVID-19 National Emergency Response Center, Epidemiology and Case Management Team, Korea Centers for Disease Control and Prevention. Coronavirus disease-19: The first 7,755 cases in the Republic of Korea. *Osong Public Health Res Perspect* 2020;11:85-90.  
[PUBMED](#) | [CROSSREF](#)
6. Korean Society of Infectious Diseases and Korea Centers for Disease Control and Prevention. Analysis on 54 mortality cases of coronavirus disease 2019 in the Republic of Korea from January 19 to March 10, 2020. *J Korean Med Sci* 2020;35:e132.  
[PUBMED](#) | [CROSSREF](#)
7. McMichael TM, Currie DW, Clark S, Pogojans S, Kay M, Schwartz NG, Lewis J, Baer A, Kawakami V, Lukoff MD, Ferro J, Brostrom-Smith C, Rea TD, Sayre MR, Riedo FX, Russell D, Hiatt B, Montgomery P, Rao AK, Chow EJ, Tobolowsky F, Hughes MJ, Bardossy AC, Oakley LP, Jacobs JR, Stone ND, Reddy SC, Jernigan JA, Honein MA, Clark TA, Duchin JS. Epidemiology of Covid-19 in a long-term care facility in King county, Washington. *N Engl J Med* 2020. [Epub ahead of print].  
[PUBMED](#) | [CROSSREF](#)
8. Bensadoun E. Nearly half of Canada's COVID-19 deaths linked to long-term care facilities: Tam. *Global News*. 13 April 2020. Available at: <https://globalnews.ca/news/6811726/coronavirus-long-term-care-deaths-canada/>. Accessed 23 April 2020.
9. Georgia Department of Community Health. Long-term care facility COVID-19 report. Available at: <https://dch.georgia.gov/announcement/2020-04-28/long-term-care-facility-covid-19-report>. Accessed 23 April 2020.
10. Chidambaram P. State reporting of cases and deaths due to COVID-19 in long-term care facilities. Available at: <https://www.kff.org/medicaid/issue-brief/state-reporting-of-cases-and-deaths-due-to-covid-19-in-long-term-care-facilities/>. Accessed 23 April 2020.
11. Ministry of Health and Welfare. Detailed matters concerning the application criteria and methods of National Health Insurance payment, Notice No. 2019-183. Available at [http://www.mohw.go.kr/react/jb/sjb-0406vw.jsp?PAR\\_MENU\\_ID=03&MENU\\_ID=030406&page=1&CONT\\_SEQ=350579](http://www.mohw.go.kr/react/jb/sjb-0406vw.jsp?PAR_MENU_ID=03&MENU_ID=030406&page=1&CONT_SEQ=350579). Accessed 23 April 2020.
12. Health Insurance Review & Assessment Service. The 7th report on the appropriateness of inpatient payment in long-term care hospitals in 2018. Available at: <http://www.hira.or.kr/bbsDummy.do?pgmid=HIRAA020049000100&brdScnBltno=4&brdBltno=32>. Accessed 23 April 2020.
13. Bucheon city. COVID-19 situation report. Available at: <https://www.bucheon.go.kr/site/main/corona>. Accessed 23 April 2020.
14. Kim OS, Jeong SY, Kim JY, So YR. Status of infection control and educational needs of nurses in long term care facilities in Korea. *Korean J Rehabil Nurs* 2018;21:1-11.  
[CROSSREF](#)
15. Jung HY, Jung YK. Recognition and performance level of hospital infection control in nurses of long-term care hospital. *Korean J Health Service Management* 2013;7:131-41.  
[CROSSREF](#)
16. European Center for Disease Prevention and Control (ECDC). Infection prevention and control and preparedness for COVID-19 in healthcare settings-second update. Available at: [https://www.ecdc.europa.eu/sites/default/files/documents/Infection-prevention-control-for-the-care-of-patients-with-2019-nCoV-healthcare-settings\\_update-31-March-2020.pdf](https://www.ecdc.europa.eu/sites/default/files/documents/Infection-prevention-control-for-the-care-of-patients-with-2019-nCoV-healthcare-settings_update-31-March-2020.pdf). Accessed 23 April 2020.
17. Statistics Korea. 2017 population and housing survey. Available at: [https://kostat.go.kr/portal/korea/kor\\_nw/1/2/2/index.board](https://kostat.go.kr/portal/korea/kor_nw/1/2/2/index.board). Accessed 23 April 2020.
18. Song CR, Lee MK, Hwang MS, Yoon YM. The Current State of Hospital-based Home Care Services in Korea: Analysis of Data on Insurance Claims for Home Care from 2007 to 2012. *J Korean Acad Soc Home Care Nurs* 2014;21:127-38.





19. Landers S, Madigan E, Leff B, Rosati RJ, McCann BA, Hornbake R, MacMillan R, Jones K, Bowles K, Dowling D, Lee T, Moorhead T, Rodriguez S, Breese E. The future of home health care: a strategic framework for optimizing value. *Home Health Care Manage Pract* 2016;28:262-78.  
[PUBMED](#) | [CROSSREF](#)
20. Lee JH, Lee GE. Perception and practice of hospital infection control of nursing staff depending on the supplementation of nurses in long-term care hospitals. *Korean J Occup Health Nurs* 2012;21:308-16.  
[CROSSREF](#)
21. Jeong SY, Kim OS, Choi JH, Lee SJ. Infection control tasks, difficulties, and educational needs of infection control practitioners in long term care facilities in Korea. *Health Social Welfare Rev* 2018;38:331-62.  
[CROSSREF](#)
22. Sohn M, Choi M. Factors related to healthcare service quality in long-term care hospitals in South Korea: a mixed-methods study. *Osong Public Health Res Perspect* 2017;8:332-41.  
[PUBMED](#) | [CROSSREF](#)
23. Korean Convalescent Hospital Association. Response manual against coronavirus disease 2019 (COVID-19) in convalescent hospitals. Ver 2.0. Available at: <http://www.kagh.co.kr/NewsSite/View/Covid19/16675.nm>. Accessed 8 May 2020.
24. National Health Insurance Service. Infection control report system. Available at <https://medicare.nhis.or.kr/portal/index.do>. Accessed 30 April 2020.
25. Arons MM, Hatfield KM, Reddy SC, Kimball A, James A, Jacobs JR, Taylor J, Spicer K, Bardossy AC, Oakley LP, Tanwar S, Dyal JW, Harney J, Chisty Z, Bell JM, Methner M, Paul P, Carlson CM, McLaughlin HP, Thornburg N, Tong S, Tamin A, Tao Y, Uehara A, Harcourt J, Clark S, Brostrom-Smith C, Page LC, Kay M, Lewis J, Montgomery P, Stone ND, Clark TA, Honein MA, Duchin JS, Jernigan JAPublic Health–Seattle and King County and CDC COVID-19 Investigation Team. Presymptomatic SARS-CoV-2 infections and transmission in a skilled nursing facility. *N Engl J Med* 2020;382:2081-90.  
[PUBMED](#) | [CROSSREF](#)
26. Gandhi M, Yokoe DS, Havlir DV. Asymptomatic transmission, the Achilles' heel of current strategies to control Covid-19. *N Engl J Med* 2020;382:2158-60.  
[PUBMED](#) | [CROSSREF](#)
